# Supplementary material for: Modelling pH and potential in dynamic structures of the water/Pt(111) interface on the atomic scale
Source: Royal Society of Chemistry journal article supplement (doi:10.1039/c7cp03576d), 2017-01-01
Supplement: c7cp03576d1.pdf [file c7cp03576d1.pdf]

Supplementary Information  
Modeling pH Effects in the Dynamic  
Pt(111)/Water Interface Structure on the  
Atomic Scale.

Martin Hangaard Hansen, Anders Nilsson & Jan Rossmeisl

August 2, 2017

The raw data is available in ASE-db format on:  
[http://nano.ku.dk/english/research/theoretical-electrocatalysis/  
katldb/](http://nano.ku.dk/english/research/theoretical-electrocatalysis/katldb/).

# 1 Isotherms

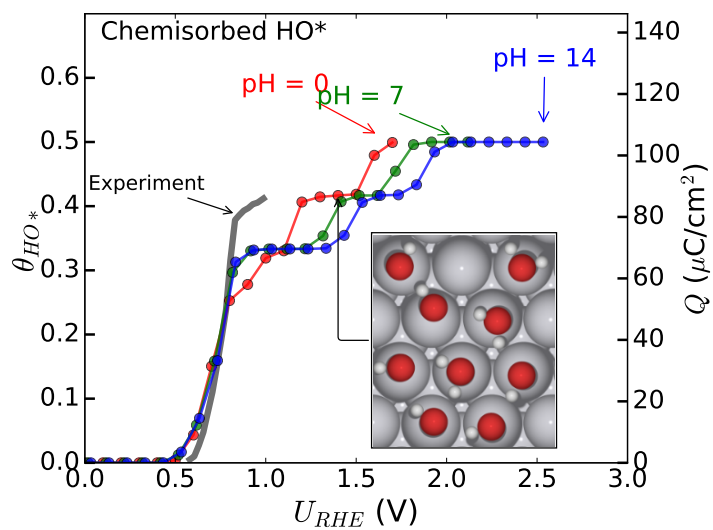

Figure S.1:  $HO^*$  coverage isotherm calculated using the GCHE method in the  $n < 0$  region from liquid water structures from molecular dynamics. This figure is repeated from Figure 1 in the paper, but also including  $pH = 7$ , which was omitted in order to not overcrowd Figure 1.

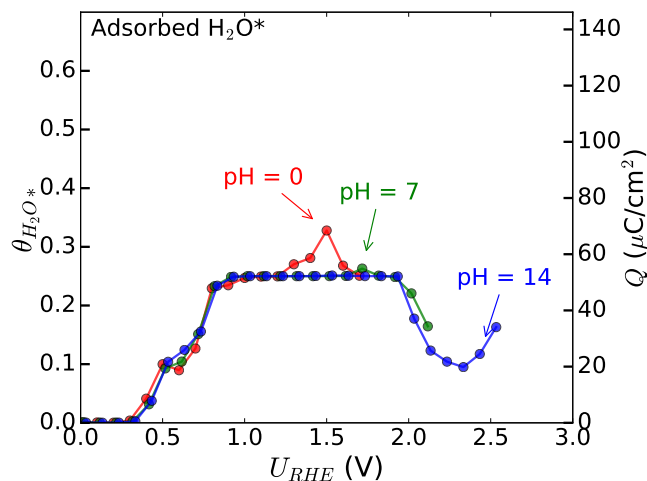

Figure S.2: Water coverage isotherm calculated using the GCHE method with liquid water structures from molecular dynamics. Water is here defined as adsorbed if the oxygen atom is within  $3\text{\AA}$  of the surface atoms, and it is only counted for states with  $n < 0$ .

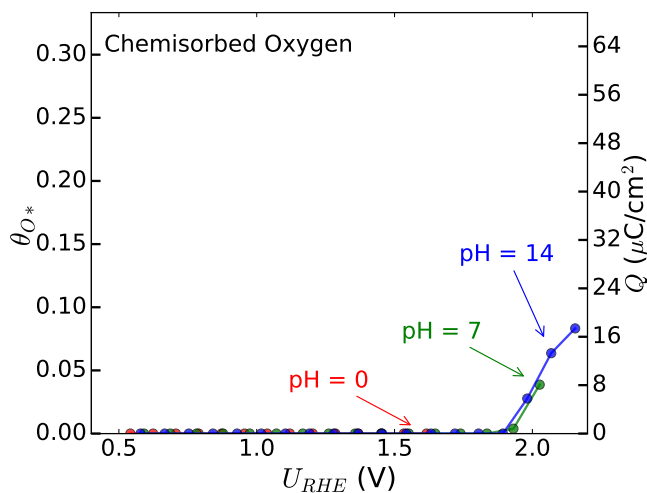

Figure S.3: Oxygen coverage isotherm calculated using the GCHE method with liquid water structures from molecular dynamics. The green datapoints are at  $\text{pH} = 7$  and the blue datapoints are at  $\text{pH} = 14$ . Note, that the dynamics were not initialized with chemisorbed  $\text{O}^*$ , but at high  $\text{HO}^*$  coverages it spontaneously formed and is thus present in the ensemble at  $n \leq -6$ .

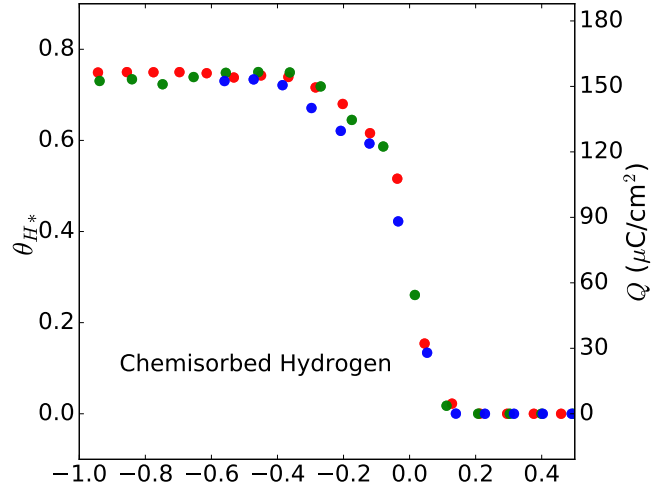

Figure S.4:  $\theta_H$  calculated using the GCHE method with liquid water structures from molecular dynamics. The red datapoints are at  $\text{pH} = 0$ , the green points are  $\text{pH} = 7$  and the blue datapoints are at  $\text{pH} = 14$

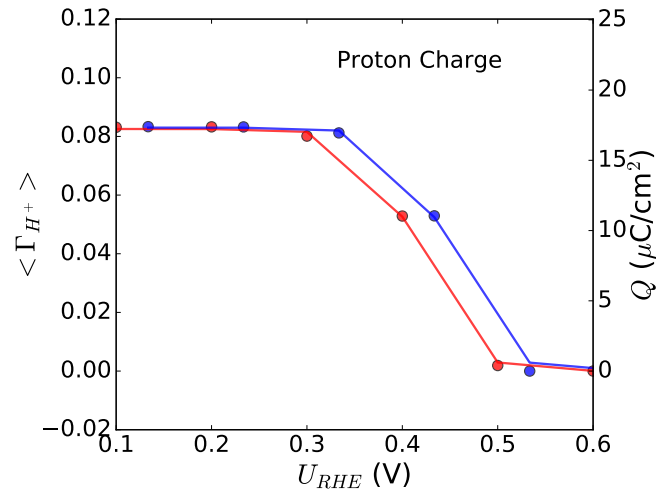

Figure S.5:  $\Gamma_{H^+}$  calculated using the GCHE method with liquid water structures from molecular dynamics. The red datapoints are at  $\text{pH} = 0$  and the blue datapoints are at  $\text{pH} = 14$

## 2 Relaxed Structures

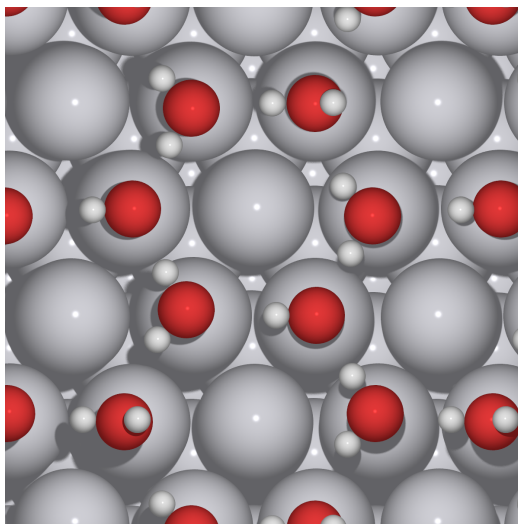

Figure S.6: Top view of a relaxed  $1/6$  ML  $\text{HO}^*$  structure with  $1/2$  ML water.

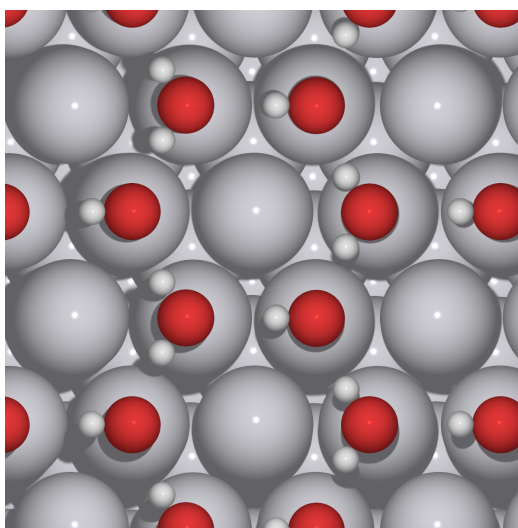

Figure S.7: Top view of a relaxed  $1/3$  ML  $\text{HO}^*$  structure with  $1/3$  ML water.

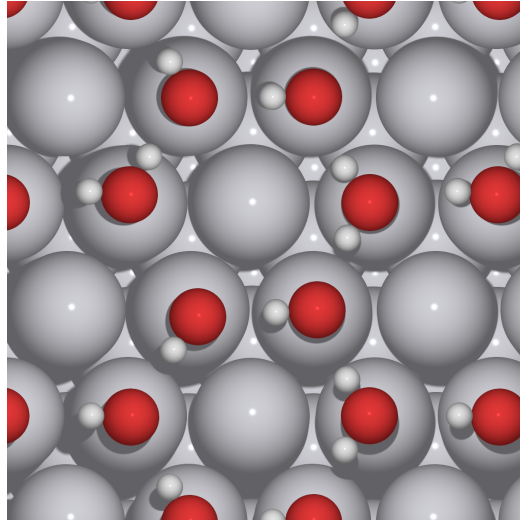

Figure S.8: Top view of a relaxed 5/12 ML HO\* structure with 3/12 ML water.

### 3 Structure averages versus proton excess and coverage

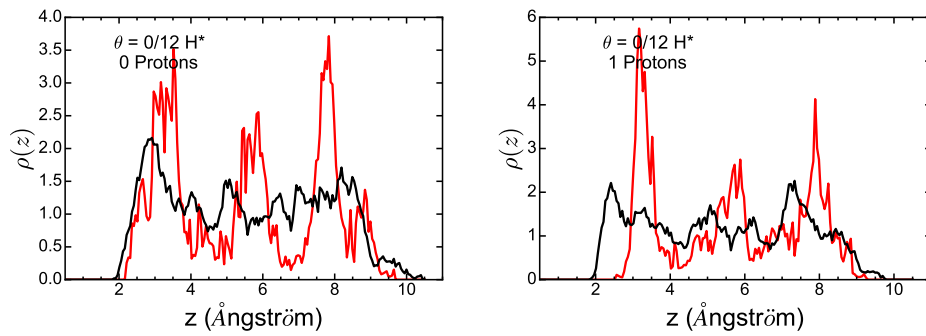

(a) The subset where  $n = \theta_H = \Gamma_{H^+} = 0$ . (b) The subset where  $\theta_H = 0$  and  $\Gamma_{H^+} = 1/12$ .

Figure S.9: The density,  $\rho(z)$ , of O atoms (red line) and H atoms (black line) versus distance from the surface.

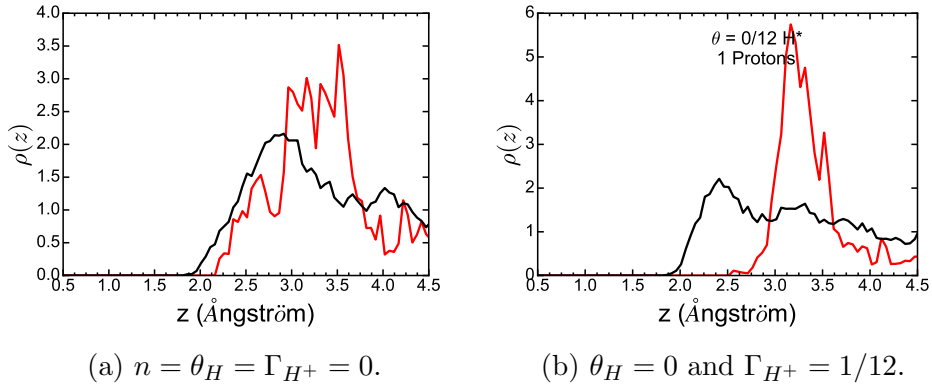

Figure S.10: Zoomed views of  $\rho(z)$ . The red lines are the  $\rho(z)$  of oxygen and the black lines are the  $\rho(z)$  of hydrogen atoms.

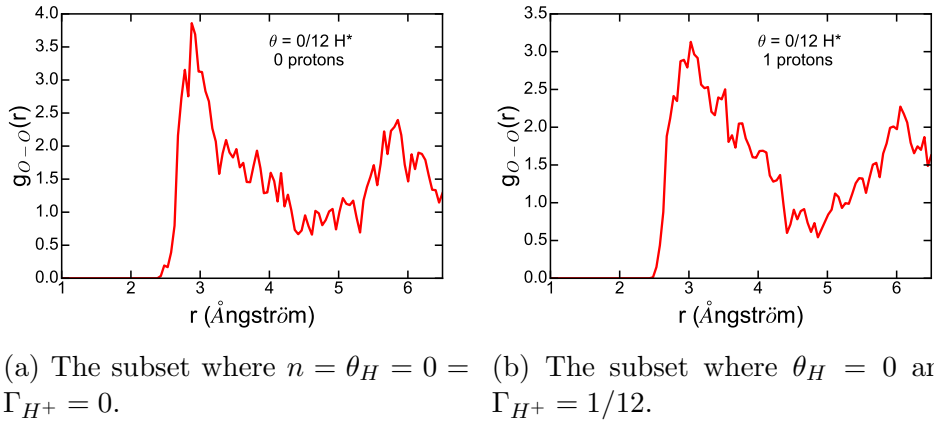

Figure S.11: In-plane O-O pair correlation functions around the first layer of water. The cut off planes were at  $z = 2.75$  Å and  $z = 3.75$  Å from the surface.

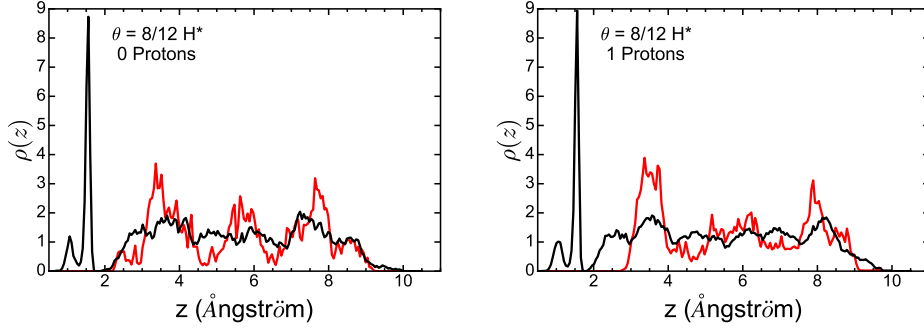

(a) The subset where  $\theta_H = 8/12$  and  $\Gamma_{H^+} = 0$ . (b) The subset where  $\theta_H = 8/12$  and  $\Gamma_{H^+} = 1/12$ .

Figure S.12: The density,  $\rho(z)$ , of O atoms (red lines) and H atoms (black lines) versus distance from the surface.

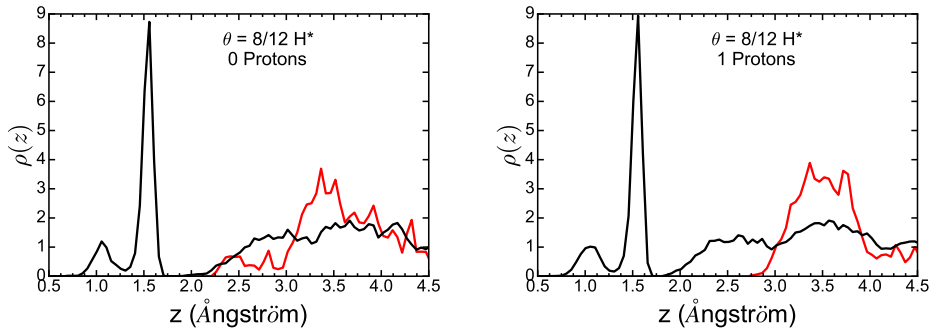

(a)  $\theta_H = 8/12$  and  $\Gamma_{H^+} = 0$ . (b)  $\theta_H = 8/12$  and  $\Gamma_{H^+} = 1/12$ .

Figure S.13: Zoomed views of  $\rho(z)$ . The red lines are the  $\rho(z)$  of oxygen and the black lines are the  $\rho(z)$  of hydrogen atoms.



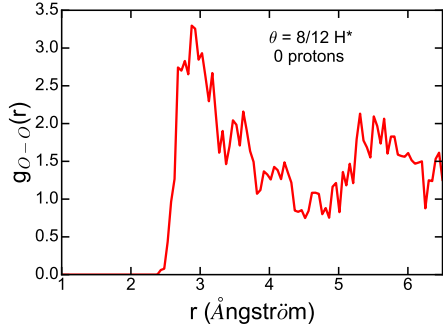

(a)  $\theta_H = 8/12$  and  $\Gamma_{H^+} = 0$ .

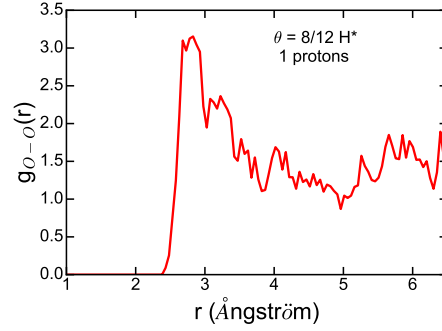

(b)  $\theta_H = 8/12$  and  $\Gamma_{H^+} = 1/12$ .

Figure S.14: In-plane O-O pair correlation functions around the first layer of water. The cut off planes were at  $z = 2.75$  Å and  $z = 3.75$  Å from the surface.

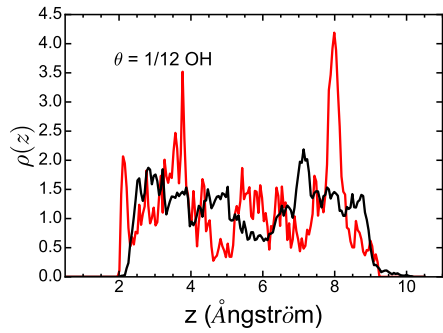

(a) Full view.

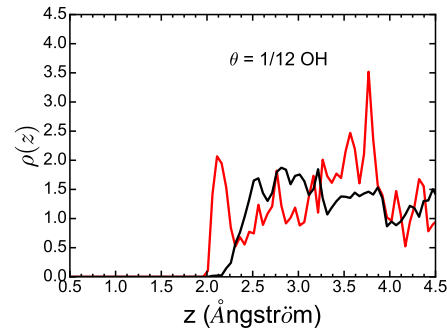

(b) Zoomed view.

Figure S.15: The density,  $\rho(z)$ , of O atoms (red line) and H atoms (black line) versus distance from the surface, in the subset where  $n = -1$ .

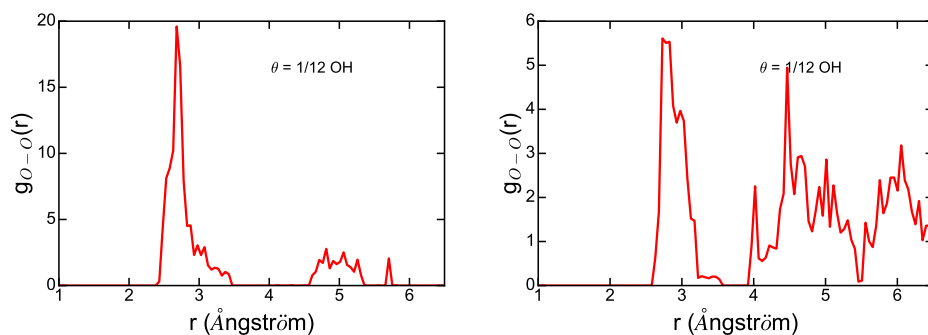

(a) The cut off planes were at  $z = 1.8$  Å and  $z = 2.6$  Å from the surface. (b) The cut off planes were at  $z = 2.35$  Å and  $z = 3.0$  Å from the surface.

Figure S.16: In-plane O-O pair correlation functions around the closest layer of oxygen atoms to the surface (in panel a) and the second closest layer (in panel b).

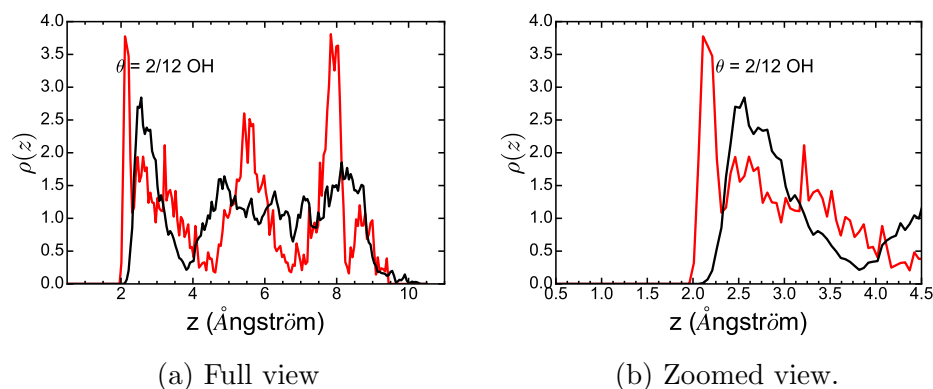

(a) Full view (b) Zoomed view. Figure S.17: The density,  $\rho(z)$ , of O atoms (red line) and H atoms (black line) versus distance from the surface, in the subset where  $n = -2$ .

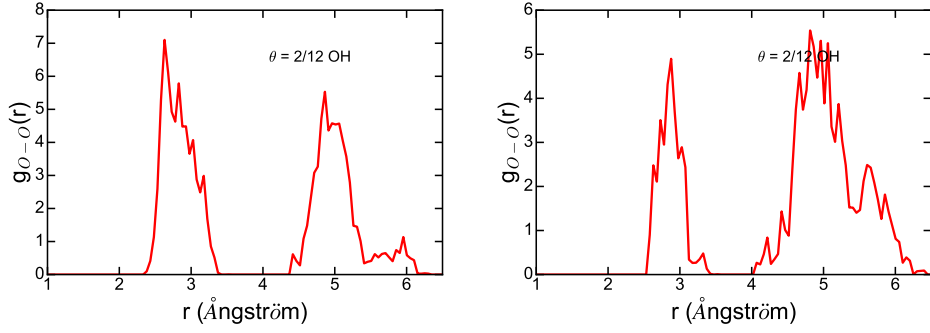

(a) The cut off planes were at  $z = 1.8$  Å and  $z = 2.6$  Å from the surface. (b) The cut off planes were at  $z = 2.35$  Å and  $z = 3.0$  Å from the surface.

Figure S.18: In-plane O-O pair correlation functions around the closest layer of oxygen atoms to the surface (in panel a) and the second closest layer (in panel b).

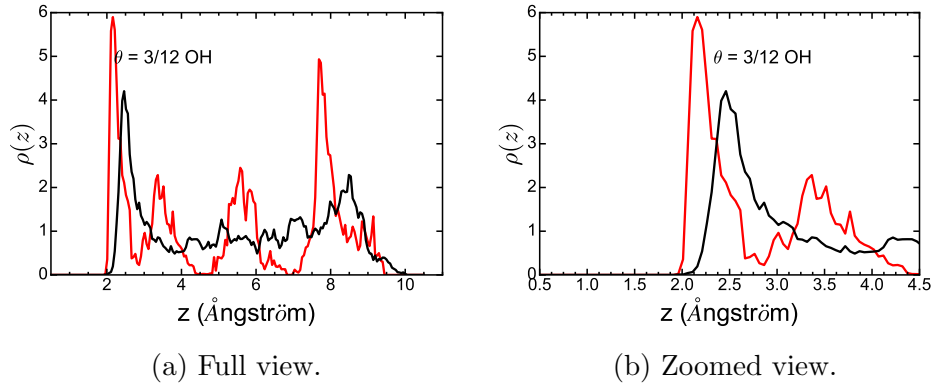

(a) Full view.

(b) Zoomed view.

Figure S.19: The density,  $\rho(z)$ , of O atoms (red line) and H atoms (black line) versus distance from the surface, in the subset where  $n = -3$ .

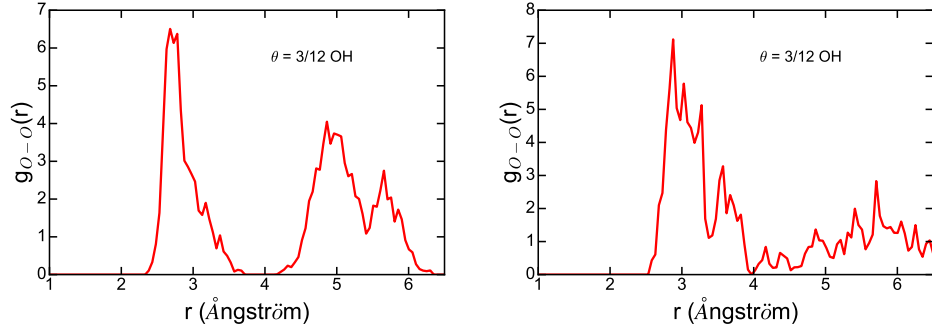

(a) The cut off planes were at  $z = 1.8$  Å and  $z = 2.6$  Å from the surface. (b) The cut off planes were at  $z = 3.2$  Å and  $z = 3.8$  Å from the surface.

Figure S.20: In-plane O-O pair correlation functions around the closest layer of oxygen atoms to the surface (in panel a) and the second closest layer (in panel b).

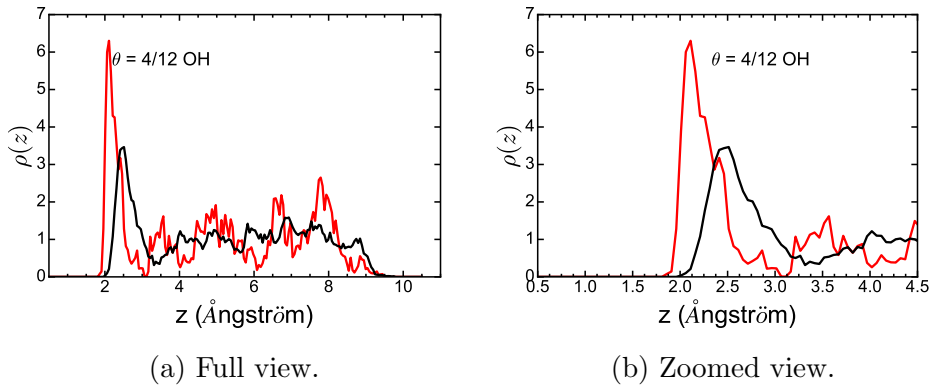

(a) Full view.

(b) Zoomed view.

Figure S.21: The density,  $\rho(z)$ , of O atoms (red line) and H atoms (black line) versus distance from the surface, in the subset where  $n = -3$ .

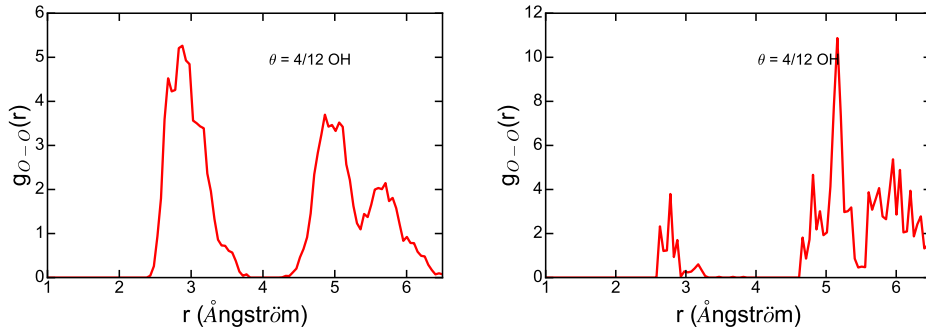

(a) The cut off planes were at  $z = 1.8$  Å and  $z = 2.6$  Å from the surface. (b) The cut off planes were at  $z = 3.2$  Å and  $z = 3.8$  Å from the surface.

Figure S.22: In-plane O-O pair correlation functions around the closest layer of oxygen atoms to the surface (in panel a) and the second closest layer (in panel b).

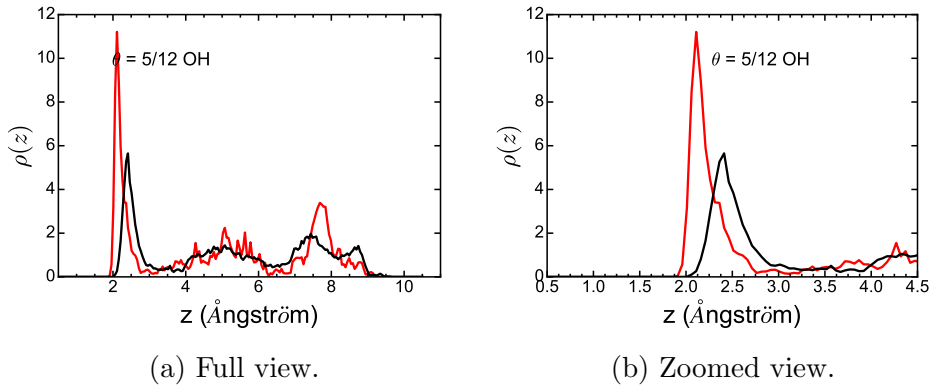

(a) Full view.

(b) Zoomed view.

Figure S.23: The density,  $\rho(z)$ , of O atoms (red line) and H atoms (black line) versus distance from the surface, in the subset where  $n = -5$ .

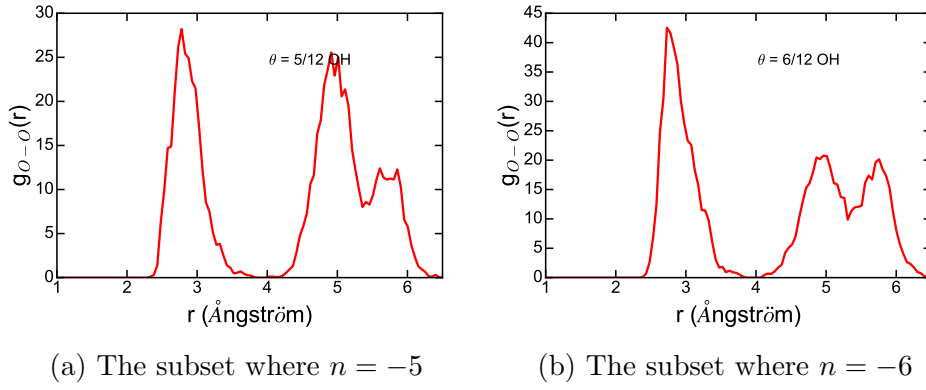

Figure S.24: In-plane O-O pair correlation functions around the closest layer of oxygen atoms to the surface. In both panels, the cut off planes were at  $z = 1.8 \text{ \AA}$  and  $z = 2.6 \text{ \AA}$  from the surface.

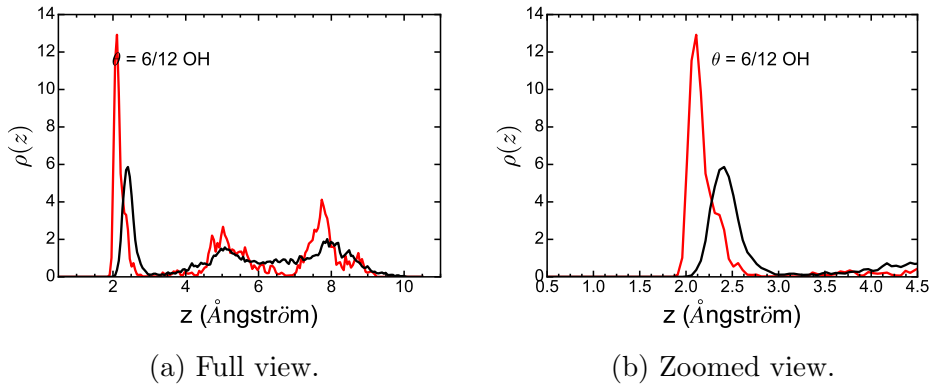

Figure S.25: The density,  $\rho(z)$ , of O atoms (red line) and H atoms (black line) versus distance from the surface, in the subset where  $n = -6$ .

## 4 Integral Energy Plots

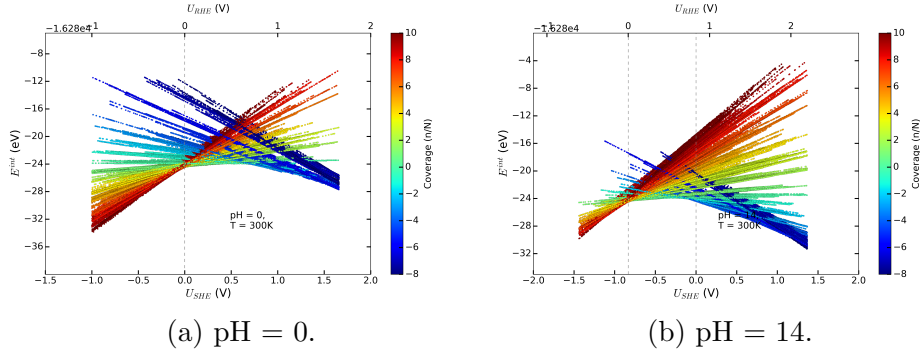

Figure S.26: Integral energies of all sampled states versus  $U_{SHE}$  and  $U_{RHE}$  on the bottom and top axis, respectively.

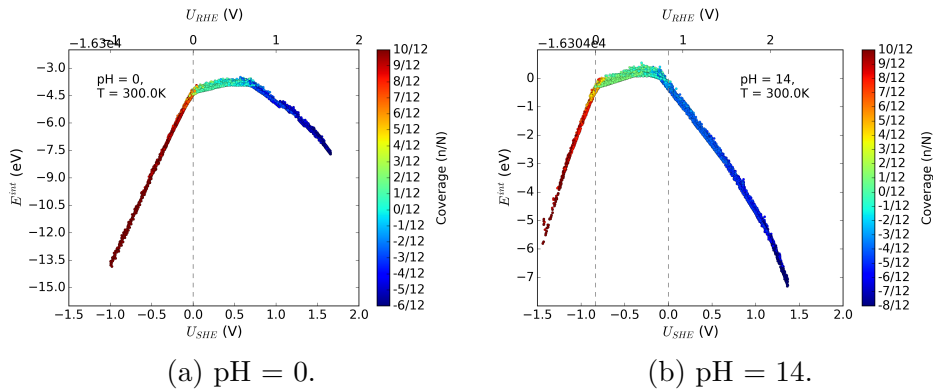

Figure S.27: Integral energies of sampled states versus  $U_{SHE}$  and  $U_{RHE}$  on the bottom and top axis, respectively. These are the ensembles remaining after Monte Carlo annealing at 300 K.

## 5 Structure convergence.

Below are structural results repeated from Fig. 4-7, compared with results of limiting the sample time to disregard the last 25% of the trajectories.

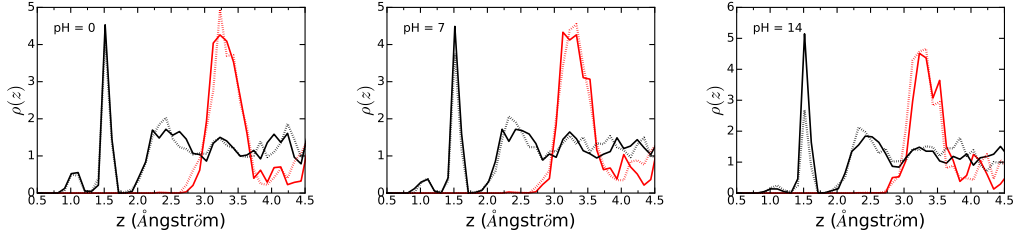

Figure S.28: Distribution of atomic distances to the surface at 0 V vs. RHE. The red line is for oxygen ions and the black line is for protons. The three panels show the distribution evaluated at various pH. The first two peaks for hydrogen at 1.0 Å and 1.5 Å are attributed to chemisorbed hydrogen in hollow and top sites respectively. The wide third peak from 2 Å to 2.7 Å is due to H-down water. The oxygen function is dominated by a layer around 3 Å to 3.5 Å, which shows the adsorbed water layer. The dashed lines are generated from samples of only 3/4 of the full sample time.

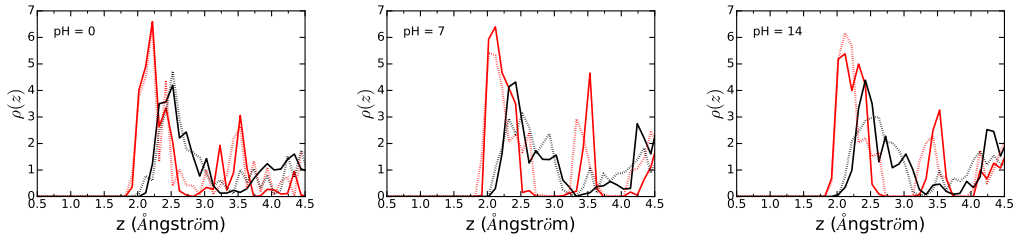

Figure S.29: Distribution of atomic distances to the surface at 1.0 V vs. RHE. The red line is for oxygen ions and the black line is for protons. The three panels show the distribution evaluated at various pH. The O density is dominated by the first peak at 2.0 Å, which is  $H_2O^*$  water and  $HO^*$ . No adsorbed hydrogen is visible, but a sharp peak close to the oxygen peak indicates up hydrogen pointing at a shallow angle away from the surface. A second hydrogen peak, distinguishable in the pH = 7 and pH = 14 panels is attributed to down pointing hydrogen from the second layer or up pointing hydrogen from the adsorbed layer. The dashed lines are generated from samples of only 3/4 of the full sample time.



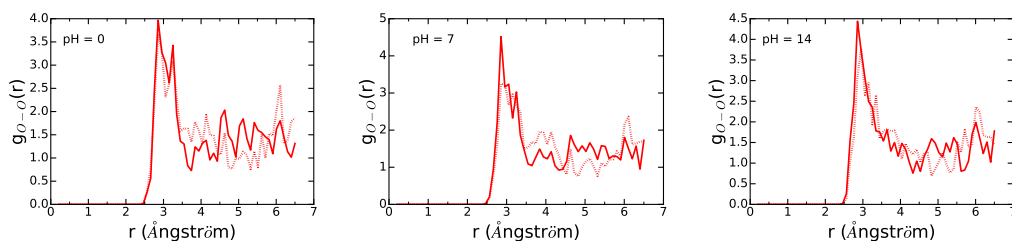

Figure S.30: *O-O pair correlation functions within the first layer of water evaluated at 0.0 V vs. RHE, at various pH. The cut off planes were at  $z = 2.75 \text{ \AA}$  and  $z = 3.75 \text{ \AA}$  from the surface atoms. The dashed lines are generated from samples of only 3/4 of the full sample time.*

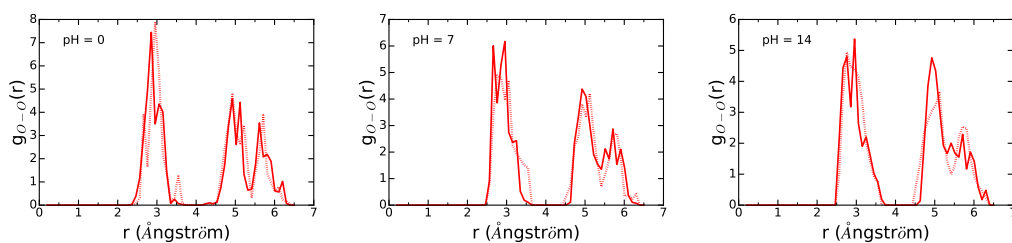

Figure S.31: *O-O pair correlation functions within the first layer of water evaluated at 1.0 V vs. RHE, at various pH. The cut off planes were at  $z = 1.8 \text{ \AA}$  and  $z = 2.6 \text{ \AA}$  from the surface atoms. The three panels show the functions evaluated at various pH. The dashed lines are generated from samples of only 3/4 of the full sample time.*
